# Supplementary material for: Retrospective observation of drug susceptibility of Candida strains in the years 1999, 2004, and 2015
Source: PeerJ. 2017 Feb 23;5:e3038. doi: 10.7717/peerj.3038 (PMC5326543; doi:10.7717/peerj.3038)
Supplement: Data S1 — Drug susceptibility was assessed using FUNGITEST® to analyze yeast-like fungal growth in the presence of six drugs: 5-fluorocytosine, amphotericin B, miconazole, ketoconazole, itraconazole and fluconazole. [file peerj-05-3038-s001.xlsx]

## Sheet: Total
Candida albicans n=630	5- fluorocytosine	Amphotericin B	Miconazole	Ketoconazole	Itraconazole	Fluconazole		non-Candida albicans n=644	5- fluorocytosine	Amphotericin B	Miconazole	Ketoconazole	Itraconazole	Fluconazole
	1	1	1	1	1	1			1	1	1	1	1	1
	1	1	1	1	1	1			1	1	1	1	1	1
	1	1	1	1	1	1			1	1	1	1	1	1
	1	1	1	1	1	1			1	1	1	1	1	1
	1	1	1	1	1	1			1	1	1	1	1	1
	1	1	1	1	1	1			1	1	1	1	1	1
	1	1	1	1	1	1			1	1	1	1	1	1
	1	1	1	1	1	1			1	1	1	1	1	1
	1	1	1	1	1	1			1	1	1	1	1	1
	1	1	1	1	1	1			1	1	1	1	1	1
	1	1	1	1	1	1			1	1	1	1	1	1
	1	1	1	1	1	1			1	1	1	1	1	1
	1	1	1	1	1	1			1	1	1	1	1	1
	1	1	1	1	1	1			1	1	1	1	1	1
	1	1	1	1	1	1			1	1	1	1	1	1
	1	1	1	1	1	1			1	1	1	1	1	1
	1	1	1	1	1	1			1	1	1	1	1	1
	1	1	1	1	1	1			1	1	1	1	1	1
	1	1	1	1	1	1			1	1	1	1	1	1
	1	1	1	1	1	1			1	1	1	1	1	1
	1	1	1	1	1	1			1	1	1	1	1	1
	1	1	1	1	1	1			1	1	1	1	1	1
	1	1	1	1	1	1			1	1	1	1	1	1
	1	1	1	1	1	1			1	1	1	1	1	1
	1	1	1	1	1	1			1	1	1	1	1	1
	1	1	1	1	1	1			1	1	1	1	1	1
	1	1	1	1	1	1			1	1	1	1	1	1
	1	1	1	1	1	1			1	1	1	1	1	1
	1	1	1	1	1	1			1	1	1	1	1	1
	1	1	1	1	1	1			1	1	1	1	1	1
	1	1	1	1	1	1			1	1	1	1	1	1
	1	1	1	1	1	1			1	1	1	1	1	1
	1	1	1	1	1	1			1	1	1	1	1	1
	1	1	1	1	1	1			1	1	1	1	1	1
	1	1	1	1	1	1			1	1	1	1	1	1
	1	1	1	1	1	1			1	1	1	1	1	1
	1	1	1	1	1	1			1	1	1	1	1	1
	1	1	1	1	1	1			1	1	1	1	1	1
	1	1	1	1	1	1			1	1	1	1	1	1
	1	1	1	1	1	1			1	1	1	1	1	1
	1	1	1	1	1	1			1	1	1	1	1	1
	1	1	1	1	1	1			1	1	1	1	1	1
	1	1	1	1	1	1			1	1	1	1	1	1
	1	1	1	1	1	1			1	1	1	1	1	1
	1	1	1	1	1	1			1	1	1	1	1	1
	1	1	1	1	1	1			1	1	1	1	1	1
	1	1	1	1	1	1			1	1	1	1	1	1
	1	1	1	1	1	1			1	1	1	1	1	1
	1	1	1	1	1	1			1	1	1	1	1	1
	1	1	1	1	1	1			1	1	1	1	1	1
	1	1	1	1	1	1			1	1	1	1	1	1
	1	1	1	1	1	1			1	1	1	1	1	1
	1	1	1	1	1	1			1	1	1	1	1	1
	1	1	1	1	1	1			1	1	1	1	1	1
	1	1	1	1	1	1			1	1	1	1	1	1
	1	1	1	1	1	1			1	1	1	1	1	1
	1	1	1	1	1	1			1	1	1	1	1	1
	1	1	1	1	1	1			1	1	1	1	1	1
	1	1	1	1	1	1			1	1	1	1	1	1
	1	1	1	1	1	1			1	1	1	1	1	1
	1	1	1	1	1	1			1	1	1	1	1	1
	1	1	1	1	1	1			1	1	1	1	1	1
	1	1	1	1	1	1			1	1	1	1	1	1
	1	1	1	1	1	1			1	1	1	1	1	1
	1	1	1	1	1	1			1	1	1	1	1	1
	1	1	1	1	1	1			1	1	1	1	1	1
	1	1	1	1	1	1			1	1	1	1	1	1
	1	1	1	1	1	1			1	1	1	1	1	1
	1	1	1	1	1	1			1	1	1	1	1	1
	1	1	1	1	1	1			1	1	1	1	1	1
	1	1	1	1	1	1			1	1	1	1	1	1
	1	1	1	1	1	1			1	1	1	1	1	1
	1	1	1	1	1	1			1	1	1	1	1	1
	1	1	1	1	1	1			1	1	1	1	1	1
	1	1	1	1	1	1			1	1	1	1	1	1
	1	1	1	1	1	1			1	1	1	1	1	1
	1	1	1	1	1	1			1	1	1	1	1	1
	1	1	1	1	1	1			1	1	1	1	1	1
	1	1	1	1	1	1			1	1	1	1	1	1
	1	1	1	1	1	1			1	1	1	1	1	1
	1	1	1	1	1	1			1	1	1	1	1	1
	1	1	1	1	1	1			1	1	1	1	1	1
	1	1	1	1	1	1			1	1	1	1	1	1
	1	1	1	1	1	1			1	1	1	1	1	1
	1	1	1	1	1	1			1	1	1	1	1	1
	1	1	1	1	1	1			1	1	1	1	1	1
	1	1	1	1	1	1			1	1	1	1	1	1
	1	1	1	1	1	1			1	1	1	1	1	1
	1	1	1	1	1	1			1	1	1	1	1	1
	1	1	1	1	2	1			1	1	1	1	1	1
	1	1	1	1	2	1			1	1	1	1	1	1
	1	1	1	1	2	1			1	1	1	1	1	1
	1	1	1	1	2	1			1	1	1	1	1	1
	1	1	1	1	2	1			1	1	1	1	1	1
	1	1	1	1	2	1			1	1	1	1	1	1
	1	1	1	1	2	1			1	1	1	1	1	1
	1	1	1	1	2	1			1	1	1	1	1	1
	1	1	1	1	2	1			1	1	1	1	1	1
	1	1	1	1	2	1			1	1	1	1	1	1
	1	1	1	1	2	1			1	1	1	1	1	1
	1	1	1	1	2	1			1	1	1	1	1	1
	1	1	1	1	2	1			1	1	1	1	1	1
	1	1	1	1	2	1			1	1	1	1	1	1
	1	1	1	1	2	1			1	1	1	1	1	1
	1	1	1	1	2	1			1	1	1	1	1	1
	1	1	1	1	2	1			1	1	1	1	1	1
	1	1	1	1	2	1			1	1	1	1	1	1
	1	1	1	1	2	1			1	1	1	1	1	1
	1	1	1	1	2	1			1	1	1	1	1	1
	1	1	1	1	2	1			1	1	1	1	1	1
	1	1	1	1	2	1			1	1	1	1	1	1
	1	1	1	1	2	1			1	1	1	1	1	1
	1	1	1	1	2	1			1	1	1	1	1	1
	1	1	1	1	2	1			1	1	1	1	1	1
	1	1	1	1	2	1			1	1	1	1	1	1
	1	1	1	1	2	1			1	1	1	1	1	1
	1	1	1	1	2	1			1	1	1	1	1	1
	1	1	1	1	2	1			1	1	1	1	1	1
	1	1	1	1	2	1			1	1	1	1	1	1
	1	1	1	1	2	1			1	1	1	1	1	1
	1	1	1	1	2	1			1	1	1	1	1	1
	1	1	1	1	2	1			1	1	1	1	1	1
	1	1	1	1	2	1			1	1	1	1	1	1
	1	1	1	1	2	1			1	1	1	1	1	1
	1	1	1	1	2	1			1	1	1	1	1	1
	1	1	1	1	2	1			1	1	1	1	1	1
	1	1	1	1	2	1			1	1	1	1	1	1
	1	1	1	1	2	1			1	1	1	1	1	1
	1	1	1	1	2	1			1	1	1	1	1	1
	1	1	1	1	2	1			1	1	1	1	1	1
	1	1	1	1	2	1			1	1	1	1	1	1
	1	1	1	1	2	1			1	1	1	1	1	1
	1	1	1	1	2	1			1	1	1	1	1	1
	1	1	1	1	2	1			1	1	1	1	1	1
	1	1	1	1	2	1			1	1	1	1	1	1
	1	1	1	1	2	1			1	1	1	1	1	1
	1	1	1	1	2	1			1	1	1	1	1	1
	1	1	1	1	2	1			1	1	1	1	1	1
	1	1	1	1	2	1			1	1	1	1	1	1
	1	1	1	1	2	1			1	1	1	1	1	1
	1	1	1	1	2	1			1	1	1	1	1	1
	1	1	1	1	2	1			1	1	1	1	1	1
	1	1	1	1	2	1			1	1	1	1	1	1
	1	1	1	1	2	1			1	1	1	1	1	1
	1	1	1	1	2	1			1	1	1	1	1	1
	1	1	1	1	2	2			1	1	1	1	1	1
	1	1	1	1	2	2			1	1	1	1	1	1
	1	1	1	1	2	2			1	1	1	1	1	1
	1	1	1	1	2	2			1	1	1	1	1	1
	1	1	1	1	2	2			1	1	1	1	1	1
	1	1	1	1	2	2			1	1	1	1	1	1
	1	1	1	1	2	2			1	1	1	1	1	1
	1	1	1	1	2	2			1	1	1	1	1	1
	1	1	1	1	2	2			1	1	1	1	1	1
	1	1	1	1	2	2			1	1	1	1	1	1
	1	1	1	1	2	2			1	1	1	1	1	1
	1	1	1	1	2	2			1	1	1	1	1	1
	1	1	1	1	2	2			1	1	1	1	1	1
	1	1	1	1	2	2			1	1	1	1	1	1
	1	1	1	1	2	2			1	1	1	1	1	1
	1	1	1	1	2	2			1	1	1	1	1	1
	1	1	1	1	2	2			1	1	1	1	1	1
	1	1	1	1	2	2			1	1	1	1	1	1
	1	1	1	1	2	2			1	1	1	1	1	1
	1	1	1	1	2	2			1	1	1	1	1	1
	1	1	1	2	2	2			1	1	1	1	1	1
	1	1	1	2	2	2			1	1	1	1	1	1
	1	1	1	2	2	2			1	1	1	1	1	1
	1	1	1	2	2	2			1	1	1	1	1	1
	1	1	1	2	2	2			1	1	1	1	1	1
	1	1	1	2	2	2			1	1	1	1	1	1
	1	1	1	2	2	2			1	1	1	1	1	1
	1	1	1	2	2	2			1	1	1	1	1	1
	1	1	1	2	2	2			1	1	1	1	1	1
	1	1	1	2	2	2			1	1	1	1	1	1
	1	1	1	2	2	2			1	1	1	1	1	1
	1	1	1	2	2	2			1	1	1	1	1	1
	1	1	1	2	2	2			1	1	1	1	1	1
	1	1	1	2	2	2			1	1	1	2	1	1
	1	1	1	2	2	2			1	1	1	2	1	1
	1	1	1	2	2	2			1	1	1	2	1	1
	1	1	1	2	2	2			1	1	1	2	1	1
	1	1	1	2	2	2			1	1	1	2	1	1
	1	1	1	2	2	2			1	1	1	2	1	1
	1	1	1	2	2	2			1	1	1	2	1	1
	1	1	1	2	2	2			1	1	1	2	1	1
	1	1	1	2	2	2			1	1	1	2	1	1
	1	1	1	2	2	2			1	1	1	2	1	1
	1	1	1	2	2	2			1	1	1	2	1	1
	1	1	1	2	2	2			1	1	1	2	1	1
	1	1	1	2	2	2			1	1	1	2	1	1
	1	1	1	2	2	2			1	1	1	2	1	1
	1	1	2	2	2	2			1	1	1	2	1	2
	1	1	2	2	2	2			1	1	1	2	1	2
	1	1	2	2	2	2			1	1	1	2	1	2
	1	1	2	2	2	2			1	1	1	2	1	2
	1	1	2	2	2	2			1	1	1	2	1	2
	1	1	2	2	2	2			1	1	1	2	1	2
	1	1	2	2	2	2			1	1	1	2	1	2
	1	1	2	2	2	2			1	1	1	2	1	2
	1	1	2	2	2	2			1	1	1	2	1	2
	1	1	2	2	2	2			1	1	1	2	1	2
	1	1	2	2	2	2			1	1	1	2	1	2
	1	1	2	2	2	2			1	1	1	2	1	2
	1	1	2	2	2	2			1	1	1	2	1	2
	1	1	2	2	2	2			1	1	1	2	1	2
	1	1	2	2	2	2			1	1	2	2	1	2
	1	1	2	2	2	2			1	1	2	2	1	2
	1	1	2	2	2	2			1	1	2	2	1	2
	1	1	2	2	2	2			1	1	2	2	1	2
	1	1	2	2	2	2			1	1	2	2	1	2
	1	1	2	2	2	2			1	1	2	2	2	2
	1	1	2	2	2	2			1	1	2	2	2	2
	1	1	2	2	2	2			1	1	2	2	2	2
	1	1	2	2	2	2			1	1	2	2	2	2
	1	1	2	2	2	2			1	1	2	2	2	2
	1	1	2	2	2	2			1	1	2	2	2	2
	1	1	2	2	2	2			1	1	2	2	2	2
	1	1	2	2	2	2			1	1	2	2	2	2
	1	1	2	2	2	2			1	1	2	2	2	2
	1	1	2	2	2	2			1	1	2	2	2	2
	1	1	2	2	2	2			1	1	2	2	2	2
	1	1	2	2	2	2			1	1	2	2	2	2
	1	1	2	2	2	2			1	1	2	2	2	2
	1	1	2	2	2	2			1	1	2	2	2	2
	1	1	2	2	2	2			1	1	2	2	2	2
	1	1	2	2	2	2			1	1	2	2	2	2
	1	1	2	2	2	2			1	1	2	2	2	2
	1	1	2	2	2	2			1	1	2	2	2	2
	1	1	2	2	2	2			1	1	2	2	2	2
	1	1	2	2	2	2			1	1	2	2	2	2
	1	1	2	2	2	2			1	1	2	2	2	2
	1	1	2	2	2	2			1	1	2	2	2	2
	1	1	2	2	2	2			1	1	2	2	2	2
	1	1	2	2	2	2			1	1	2	2	2	2
	1	1	2	2	2	2			1	1	2	2	2	2
	1	1	2	2	2	2			1	1	2	2	2	2
	1	1	2	2	2	2			1	1	2	2	2	2
	1	1	2	2	2	2			1	1	2	2	2	2
	1	1	2	2	2	2			1	1	2	2	2	2
	1	1	2	2	2	2			1	1	2	2	2	2
	1	1	2	2	2	2			1	1	2	2	2	2
	1	1	2	2	2	2			1	1	2	2	2	2
	1	1	2	2	2	2			1	1	2	2	2	2
	1	1	2	2	2	2			1	1	2	2	2	2
	1	1	2	2	2	2			1	1	2	2	2	2
	1	1	2	2	2	2			1	1	2	2	2	2
	1	1	2	2	2	2			1	1	2	2	2	2
	1	1	2	2	2	2			1	1	2	2	2	2
	1	1	2	2	2	2			1	1	2	2	2	2
	1	1	2	2	2	2			1	1	2	2	2	2
	1	1	2	2	2	2			1	1	2	2	2	2
	1	1	2	2	2	2			1	1	2	2	2	2
	1	1	2	2	2	2			1	1	2	2	2	2
	1	1	2	2	2	2			1	1	2	2	2	2
	1	1	2	2	2	2			1	1	2	2	2	2
	1	1	2	2	2	2			1	1	2	2	2	2
	1	1	2	2	2	3			1	1	2	2	2	2
	1	1	2	2	2	3			1	1	2	2	2	2
	1	1	2	2	2	3			1	1	2	2	2	2
	1	1	2	2	2	3			1	1	2	2	2	2
	1	1	2	2	2	3			1	1	2	2	2	2
	1	1	2	2	2	3			1	1	2	2	2	2
	1	1	2	2	2	3			1	1	2	2	2	2
	1	1	2	2	2	3			1	1	2	2	2	2
	1	1	2	2	2	3			1	1	2	2	2	2
	1	1	2	2	2	3			1	1	2	2	2	2
	1	1	2	2	2	3			1	1	2	2	2	2
	1	1	2	2	2	3			1	1	2	2	2	2
	1	1	2	2	2	3			1	1	2	2	2	2
	1	1	2	2	2	3			1	1	2	2	2	2
	1	1	2	2	2	3			1	1	2	2	2	2
	1	1	2	2	3	3			1	1	2	2	2	2
	1	1	2	2	3	3			1	1	2	2	2	2
	1	1	2	2	3	3			1	1	2	2	2	2
	1	1	2	2	3	3			1	1	2	2	2	2
	1	1	2	2	3	3			1	1	2	2	2	2
	1	1	2	2	3	3			1	1	2	2	2	2
	1	1	2	2	3	3			1	1	2	2	2	2
	1	1	2	2	3	3			1	1	2	2	2	2
	1	1	2	2	3	3			1	1	2	2	2	2
	1	1	2	2	3	3			1	1	2	2	2	2
	1	1	2	2	3	3			1	1	2	2	2	2
	1	1	2	2	3	3			1	1	2	2	2	2
	1	1	2	2	3	3			1	1	2	2	2	2
	1	1	2	2	3	3			1	1	2	2	2	2
	1	1	2	2	3	3			1	1	2	2	2	2
	1	1	2	2	3	3			1	1	2	2	2	2
	1	1	2	2	3	3			1	1	2	2	2	2
	1	1	2	2	3	3			1	1	2	2	2	2
	1	1	2	2	3	3			1	1	2	2	2	2
	1	1	2	2	3	3			1	1	2	2	2	2
	1	1	2	2	3	3			1	1	2	2	2	2
	1	1	2	2	3	3			1	1	2	2	2	2
	1	1	2	2	3	3			1	1	2	2	2	2
	1	1	2	2	3	3			1	1	2	2	2	2
	1	1	2	2	3	3			1	1	2	2	2	2
	1	1	2	2	3	3			1	1	2	2	2	2
	1	1	2	2	3	3			1	1	2	2	2	2
	1	1	2	2	3	3			1	1	2	2	2	2
	1	1	2	2	3	3			1	1	2	2	2	2
	1	1	2	2	3	3			1	1	2	2	2	2
	1	1	2	2	3	3			1	1	2	2	2	2
	1	1	2	2	3	3			1	1	2	2	2	2
	1	1	2	2	3	3			1	1	2	2	2	2
	1	1	2	2	3	3			1	1	2	2	2	2
	1	1	2	2	3	3			1	1	2	2	2	2
	1	1	2	2	3	3			1	1	2	2	2	2
	1	1	2	2	3	3			1	1	2	2	2	2
	1	1	2	2	3	3			1	1	2	2	2	2
	1	1	2	2	3	3			1	1	2	2	2	2
	1	1	2	2	3	3			1	1	2	2	2	2
	1	1	2	2	3	3			1	1	2	2	2	2
	1	1	2	2	3	3			1	1	2	2	2	2
	1	1	2	2	3	3			1	1	2	2	2	2
	1	1	2	2	3	3			1	1	2	2	2	2
	1	1	2	2	3	3			1	1	2	2	2	2
	1	1	2	2	3	3			1	1	2	2	2	2
	1	1	2	2	3	3			1	1	2	2	2	2
	1	1	2	2	3	3			1	1	2	3	2	2
	1	1	2	2	3	3			1	1	2	3	2	2
	1	1	2	2	3	3			1	1	2	3	2	2
	1	1	2	2	3	3			1	1	2	3	2	2
	1	1	2	2	3	3			1	1	2	3	2	2
	1	1	2	2	3	3			1	1	2	3	2	2
	1	1	2	2	3	3			1	1	2	3	2	2
	1	1	2	2	3	3			1	1	2	3	2	2
	1	1	2	2	3	3			1	1	2	3	2	2
	1	1	2	2	3	3			1	1	2	3	2	2
	1	1	2	2	3	3			1	1	2	3	2	2
	1	1	2	2	3	3			1	1	2	3	2	2
	1	1	2	2	3	3			1	1	2	3	2	2
	1	1	2	2	3	3			1	1	2	3	2	2
	1	1	2	2	3	3			1	1	2	3	2	2
	1	1	2	2	3	3			1	1	2	3	2	2
	1	1	2	2	3	3			1	1	2	3	2	2
	1	1	2	2	3	3			1	1	2	3	2	2
	1	1	2	2	3	3			1	1	2	3	2	2
	1	1	2	2	3	3			1	1	2	3	2	2
	1	1	2	2	3	3			1	1	2	3	2	3
	1	1	2	2	3	3			1	1	2	3	2	3
	1	1	2	2	3	3			1	1	2	3	2	3
	1	1	2	2	3	3			1	1	2	3	2	3
	1	1	2	2	3	3			1	1	2	3	2	3
	1	1	2	2	3	3			1	1	2	3	2	3
	1	1	2	2	3	3			1	1	2	3	2	3
	1	1	2	2	3	3			1	1	2	3	2	3
	1	1	2	2	3	3			1	1	2	3	2	3
	1	1	2	2	3	3			1	1	2	3	2	3
	1	1	2	2	3	3			1	1	2	3	2	3
	1	1	2	2	3	3			1	1	2	3	2	3
	1	1	2	2	3	3			1	1	2	3	2	3
	1	1	2	2	3	3			1	1	2	3	2	3
	1	1	2	2	3	3			1	1	2	3	2	3
	1	1	2	2	3	3			1	1	2	3	2	3
	1	1	2	2	3	3			1	1	2	3	2	3
	1	1	2	2	3	3			1	1	2	3	2	3
	1	1	2	2	3	3			1	1	2	3	3	3
	1	1	2	2	3	3			1	1	2	3	3	3
	1	1	2	2	3	3			1	1	2	3	3	3
	1	1	2	2	3	3			1	1	2	3	3	3
	1	1	2	2	3	3			1	1	2	3	3	3
	1	1	2	2	3	3			1	1	2	3	3	3
	1	1	2	2	3	3			1	1	2	3	3	3
	1	1	2	2	3	3			1	1	2	3	3	3
	1	1	2	2	3	3			1	1	2	3	3	3
	1	1	2	2	3	3			1	1	2	3	3	3
	1	1	2	2	3	3			1	1	2	3	3	3
	1	1	2	2	3	3			1	1	2	3	3	3
	1	1	2	2	3	3			1	1	2	3	3	3
	1	1	2	2	3	3			1	1	2	3	3	3
	1	1	2	2	3	3			1	1	2	3	3	3
	1	1	2	2	3	3			1	1	2	3	3	3
	1	1	2	2	3	3			1	1	2	3	3	3
	1	1	2	2	3	3			1	1	2	3	3	3
	1	1	2	2	3	3			1	1	2	3	3	3
	1	1	2	2	3	3			1	1	2	3	3	3
	1	1	2	2	3	3			1	1	2	3	3	3
	1	1	2	2	3	3			1	1	2	3	3	3
	1	1	2	2	3	3			1	1	2	3	3	3
	1	1	2	2	3	3			1	1	2	3	3	3
	1	1	2	2	3	3			1	1	2	3	3	3
	1	1	2	2	3	3			1	1	2	3	3	3
	1	1	2	2	3	3			1	1	2	3	3	3
	1	1	2	2	3	3			1	1	2	3	3	3
	1	1	2	2	3	3			1	1	2	3	3	3
	1	1	2	2	3	3			1	1	2	3	3	3
	1	1	2	2	3	3			1	1	2	3	3	3
	1	1	2	2	3	3			1	1	2	3	3	3
	1	1	2	2	3	3			1	1	2	3	3	3
	1	1	2	2	3	3			1	1	2	3	3	3
	1	1	2	2	3	3			1	1	2	3	3	3
	1	1	2	3	3	3			1	1	2	3	3	3
	1	1	2	3	3	3			1	1	2	3	3	3
	1	1	2	3	3	3			1	1	2	3	3	3
	1	1	2	3	3	3			1	1	2	3	3	3
	1	1	2	3	3	3			1	1	2	3	3	3
	1	1	2	3	3	3			1	1	2	3	3	3
	1	1	2	3	3	3			1	1	2	3	3	3
	1	2	2	3	3	3			1	1	2	3	3	3
	1	2	2	3	3	3			1	1	2	3	3	3
	1	2	2	3	3	3			1	1	2	3	3	3
	1	2	2	3	3	3			1	1	2	3	3	3
	1	2	2	3	3	3			1	1	2	3	3	3
	1	2	2	3	3	3			1	1	2	3	3	3
	1	2	2	3	3	3			1	1	2	3	3	3
	1	2	2	3	3	3			1	1	2	3	3	3
	1	2	2	3	3	3			1	1	2	3	3	3
	1	2	2	3	3	3			1	1	2	3	3	3
	1	2	2	3	3	3			1	2	2	3	3	3
	1	2	2	3	3	3			1	2	2	3	3	3
	1	2	2	3	3	3			1	2	2	3	3	3
	1	2	2	3	3	3			1	2	2	3	3	3
	1	2	2	3	3	3			1	2	2	3	3	3
	1	2	2	3	3	3			1	2	2	3	3	3
	1	2	2	3	3	3			1	2	2	3	3	3
	1	2	2	3	3	3			1	2	2	3	3	3
	1	2	2	3	3	3			1	2	2	3	3	3
	1	2	2	3	3	3			1	2	2	3	3	3
	1	2	3	3	3	3			1	2	2	3	3	3
	1	2	3	3	3	3			1	2	2	3	3	3
	1	2	3	3	3	3			1	2	2	3	3	3
	1	2	3	3	3	3			1	2	2	3	3	3
	1	2	3	3	3	3			1	2	2	3	3	3
	1	2	3	3	3	3			1	2	2	3	3	3
	1	2	3	3	3	3			1	2	2	3	3	3
	1	2	3	3	3	3			1	2	2	3	3	3
	2	2	3	3	3	3			1	2	2	3	3	3
	2	2	3	3	3	3			1	2	2	3	3	3
	2	2	3	3	3	3			1	2	2	3	3	3
	2	2	3	3	3	3			1	2	2	3	3	3
	2	2	3	3	3	3			1	2	2	3	3	3
	2	2	3	3	3	3			1	2	2	3	3	3
	2	2	3	3	3	3			1	2	2	3	3	3
	2	2	3	3	3	3			1	2	2	3	3	3
	2	2	3	3	3	3			1	2	2	3	3	3
	2	2	3	3	3	3			1	2	2	3	3	3
	2	2	3	3	3	3			1	2	2	3	3	3
	2	2	3	3	3	3			1	2	2	3	3	3
	2	2	3	3	3	3			1	2	2	3	3	3
	2	2	3	3	3	3			1	2	2	3	3	3
	2	2	3	3	3	3			1	2	2	3	3	3
	2	2	3	3	3	3			1	2	2	3	3	3
	2	2	3	3	3	3			1	2	2	3	3	3
	2	2	3	3	3	3			1	2	2	3	3	3
	2	2	3	3	3	3			1	2	2	3	3	3
	2	2	3	3	3	3			1	2	2	3	3	3
	2	2	3	3	3	3			1	2	3	3	3	3
	2	2	3	3	3	3			1	2	3	3	3	3
	2	2	3	3	3	3			2	2	3	3	3	3
	2	2	3	3	3	3			2	2	3	3	3	3
	2	2	3	3	3	3			2	2	3	3	3	3
	2	2	3	3	3	3			2	2	3	3	3	3
	2	2	3	3	3	3			2	2	3	3	3	3
	2	2	3	3	3	3			2	2	3	3	3	3
	2	2	3	3	3	3			2	2	3	3	3	3
	2	2	3	3	3	3			2	2	3	3	3	3
	2	2	3	3	3	3			2	2	3	3	3	3
	2	2	3	3	3	3			2	2	3	3	3	3
	2	2	3	3	3	3			2	2	3	3	3	3
	2	2	3	3	3	3			2	2	3	3	3	3
	2	2	3	3	3	3			2	2	3	3	3	3
	2	2	3	3	3	3			2	2	3	3	3	3
	2	2	3	3	3	3			2	2	3	3	3	3
	2	2	3	3	3	3			2	2	3	3	3	3
	2	2	3	3	3	3			2	2	3	3	3	3
	2	2	3	3	3	3			2	2	3	3	3	3
	2	2	3	3	3	3			2	2	3	3	3	3
	2	2	3	3	3	3			2	2	3	3	3	3
	2	2	3	3	3	3			2	2	3	3	3	3
	2	2	3	3	3	3			2	2	3	3	3	3
	2	2	3	3	3	3			2	2	3	3	3	3
	2	2	3	3	3	3			2	2	3	3	3	3
	2	2	3	3	3	3			2	2	3	3	3	3
	2	2	3	3	3	3			2	2	3	3	3	3
	2	2	3	3	3	3			2	2	3	3	3	3
	2	2	3	3	3	3			2	2	3	3	3	3
	2	2	3	3	3	3			2	2	3	3	3	3
	2	2	3	3	3	3			2	2	3	3	3	3
	2	2	3	3	3	3			2	2	3	3	3	3
	2	2	3	3	3	3			2	2	3	3	3	3
	2	2	3	3	3	3			2	2	3	3	3	3
	2	2	3	3	3	3			2	2	3	3	3	3
	2	2	3	3	3	3			2	2	3	3	3	3
	2	2	3	3	3	3			2	2	3	3	3	3
	2	2	3	3	3	3			2	2	3	3	3	3
	2	2	3	3	3	3			2	2	3	3	3	3
	2	2	3	3	3	3			2	2	3	3	3	3
	2	2	3	3	3	3			2	2	3	3	3	3
	2	2	3	3	3	3			2	2	3	3	3	3
	2	2	3	3	3	3			2	2	3	3	3	3
	2	2	3	3	3	3			2	2	3	3	3	3
	2	2	3	3	3	3			2	2	3	3	3	3
	2	2	3	3	3	3			2	2	3	3	3	3
	2	2	3	3	3	3			2	2	3	3	3	3
	2	2	3	3	3	3			2	2	3	3	3	3
	2	2	3	3	3	3			2	2	3	3	3	3
	2	2	3	3	3	3			2	2	3	3	3	3
	2	2	3	3	3	3			2	2	3	3	3	3
	2	2	3	3	3	3			2	2	3	3	3	3
	2	2	3	3	3	3			2	2	3	3	3	3
	2	2	3	3	3	3			2	2	3	3	3	3
	2	2	3	3	3	3			2	2	3	3	3	3
	2	2	3	3	3	3			2	2	3	3	3	3
	2	2	3	3	3	3			2	2	3	3	3	3
	2	2	3	3	3	3			2	2	3	3	3	3
	2	2	3	3	3	3			2	2	3	3	3	3
	2	2	3	3	3	3			2	2	3	3	3	3
	2	2	3	3	3	3			2	2	3	3	3	3
	2	2	3	3	3	3			2	2	3	3	3	3
	2	2	3	3	3	3			2	2	3	3	3	3
	2	2	3	3	3	3			2	2	3	3	3	3
	2	2	3	3	3	3			2	2	3	3	3	3
	2	2	3	3	3	3			2	2	3	3	3	3
	2	2	3	3	3	3			2	2	3	3	3	3
	2	2	3	3	3	3			2	2	3	3	3	3
	2	2	3	3	3	3			2	2	3	3	3	3
	2	2	3	3	3	3			2	2	3	3	3	3
	2	2	3	3	3	3			2	2	3	3	3	3
	2	2	3	3	3	3			2	2	3	3	3	3
	2	2	3	3	3	3			2	2	3	3	3	3
	2	2	3	3	3	3			2	2	3	3	3	3
	2	2	3	3	3	3			2	2	3	3	3	3
	2	2	3	3	3	3			2	2	3	3	3	3
	2	2	3	3	3	3			2	2	3	3	3	3
	2	2	3	3	3	3			2	2	3	3	3	3
	2	2	3	3	3	3			2	2	3	3	3	3
	2	2	3	3	3	3			2	2	3	3	3	3
	2	2	3	3	3	3			2	2	3	3	3	3
	2	2	3	3	3	3			2	2	3	3	3	3
	2	2	3	3	3	3			2	2	3	3	3	3
	2	2	3	3	3	3			2	2	3	3	3	3
	2	2	3	3	3	3			2	2	3	3	3	3
	2	2	3	3	3	3			2	2	3	3	3	3
	2	2	3	3	3	3			2	2	3	3	3	3
	2	2	3	3	3	3			2	2	3	3	3	3
	2	2	3	3	3	3			2	2	3	3	3	3
	2	2	3	3	3	3			2	2	3	3	3	3
	2	2	3	3	3	3			2	2	3	3	3	3
	2	2	3	3	3	3			2	2	3	3	3	3
	2	2	3	3	3	3			2	2	3	3	3	3
	2	2	3	3	3	3			2	2	3	3	3	3
	2	2	3	3	3	3			2	2	3	3	3	3
	2	2	3	3	3	3			2	2	3	3	3	3
	2	2	3	3	3	3			2	2	3	3	3	3
	2	2	3	3	3	3			2	2	3	3	3	3
	2	2	3	3	3	3			2	2	3	3	3	3
	2	2	3	3	3	3			2	2	3	3	3	3
	2	2	3	3	3	3			2	2	3	3	3	3
	2	2	3	3	3	3			2	2	3	3	3	3
	2	2	3	3	3	3			2	2	3	3	3	3
	2	2	3	3	3	3			2	2	3	3	3	3
	2	2	3	3	3	3			2	2	3	3	3	3
	2	2	3	3	3	3			2	2	3	3	3	3
	2	2	3	3	3	3			2	2	3	3	3	3
	2	2	3	3	3	3			2	2	3	3	3	3
	2	2	3	3	3	3			2	2	3	3	3	3
	2	2	3	3	3	3			2	2	3	3	3	3
	2	2	3	3	3	3			2	2	3	3	3	3
	2	2	3	3	3	3			2	2	3	3	3	3
	2	2	3	3	3	3			2	2	3	3	3	3
	2	2	3	3	3	3			2	2	3	3	3	3
	2	2	3	3	3	3			2	2	3	3	3	3
	2	2	3	3	3	3			2	2	3	3	3	3
	2	2	3	3	3	3			2	2	3	3	3	3
	2	2	3	3	3	3			2	2	3	3	3	3
	2	2	3	3	3	3			2	2	3	3	3	3
	2	2	3	3	3	3			2	2	3	3	3	3
	2	2	3	3	3	3			2	2	3	3	3	3
	2	2	3	3	3	3			2	2	3	3	3	3
	2	2	3	3	3	3			2	2	3	3	3	3
	3	2	3	3	3	3			2	2	3	3	3	3
	3	2	3	3	3	3			2	2	3	3	3	3
	3	2	3	3	3	3			2	2	3	3	3	3
	3	2	3	3	3	3			2	2	3	3	3	3
	3	2	3	3	3	3			2	2	3	3	3	3
	3	2	3	3	3	3			2	2	3	3	3	3
	3	2	3	3	3	3			2	2	3	3	3	3
	3	2	3	3	3	3			2	2	3	3	3	3
	3	2	3	3	3	3			2	2	3	3	3	3
	3	2	3	3	3	3			2	2	3	3	3	3
	3	2	3	3	3	3			2	2	3	3	3	3
	3	2	3	3	3	3			2	2	3	3	3	3
	3	2	3	3	3	3			2	2	3	3	3	3
	3	2	3	3	3	3			2	2	3	3	3	3
	3	2	3	3	3	3			2	2	3	3	3	3
	3	2	3	3	3	3			2	2	3	3	3	3
	3	2	3	3	3	3			2	2	3	3	3	3
	3	2	3	3	3	3			2	2	3	3	3	3
	3	2	3	3	3	3			2	2	3	3	3	3
	3	2	3	3	3	3			2	2	3	3	3	3
	3	3	3	3	3	3			2	2	3	3	3	3
	3	3	3	3	3	3			2	2	3	3	3	3
	3	3	3	3	3	3			3	2	3	3	3	3
	3	3	3	3	3	3			3	2	3	3	3	3
	3	3	3	3	3	3			3	2	3	3	3	3
	3	3	3	3	3	3			3	2	3	3	3	3
	3	3	3	3	3	3			3	2	3	3	3	3
	3	3	3	3	3	3			3	2	3	3	3	3
	3	3	3	3	3	3			3	2	3	3	3	3
	3	3	3	3	3	3			3	2	3	3	3	3
	3	3	3	3	3	3			3	2	3	3	3	3
	3	3	3	3	3	3			3	2	3	3	3	3
	3	3	3	3	3	3			3	2	3	3	3	3
	3	3	3	3	3	3			3	2	3	3	3	3
	3	3	3	3	3	3			3	2	3	3	3	3
	3	3	3	3	3	3			3	3	3	3	3	3
	3	3	3	3	3	3			3	3	3	3	3	3
	3	3	3	3	3	3			3	3	3	3	3	3
	3	3	3	3	3	3			3	3	3	3	3	3
	3	3	3	3	3	3			3	3	3	3	3	3
	3	3	3	3	3	3			3	3	3	3	3	3
	3	3	3	3	3	3			3	3	3	3	3	3
	3	3	3	3	3	3			3	3	3	3	3	3
	3	3	3	3	3	3			3	3	3	3	3	3
	3	3	3	3	3	3			3	3	3	3	3	3
	3	3	3	3	3	3			3	3	3	3	3	3
	3	3	3	3	3	3			3	3	3	3	3	3
	3	3	3	3	3	3			3	3	3	3	3	3
	3	3	3	3	3	3			3	3	3	3	3	3
	3	3	3	3	3	3			3	3	3	3	3	3
	3	3	3	3	3	3			3	3	3	3	3	3
	3	3	3	3	3	3			3	3	3	3	3	3
	3	3	3	3	3	3			3	3	3	3	3	3
	3	3	3	3	3	3			3	3	3	3	3	3
	3	3	3	3	3	3			3	3	3	3	3	3
	3	3	3	3	3	3			3	3	3	3	3	3
	3	3	3	3	3	3			3	3	3	3	3	3
	3	3	3	3	3	3			3	3	3	3	3	3
	3	3	3	3	3	3			3	3	3	3	3	3
									3	3	3	3	3	3
1 Susceptible	427	399	192	165	89	145			3	3	3	3	3	3
2 Intermediate	144	192	227	227	183	112			3	3	3	3	3	3
3 Resistant	59	39	211	238	358	373			3	3	3	3	3	3
Total	630	630	630	630	630	630			3	3	3	3	3	3
									3	3	3	3	3	3
									3	3	3	3	3	3
									3	3	3	3	3	3
									3	3	3	3	3	3
									3	3	3	3	3	3
									3	3	3	3	3	3
									3	3	3	3	3	3
									3	3	3	3	3	3
									3	3	3	3	3	3
								1 Susceptible	449	409	206	178	211	192
								2 Intermediate	144	197	241	141	146	147
								3 Resistant	51	38	197	325	287	305
								Total	644	644	644	644	644	644

## Sheet: 1999
Candida albicans n=282	5- fluorocytosine	Amphotericin B	Miconazole	Ketoconazole	Itraconazole	Fluconazole		non-Candida albicans n=170	5- fluorocytosine	Amphotericin B	Miconazole	Ketoconazole	Itraconazole	Fluconazole
	1	1	1	1	1	1			1	1	1	1	1	1
	1	1	1	1	1	1			1	1	1	1	1	1
	1	1	1	1	1	1			1	1	1	1	1	1
	1	1	1	1	1	1			1	1	1	1	1	1
	1	1	1	1	1	1			1	1	1	1	1	1
	1	1	1	1	1	1			1	1	1	1	1	1
	1	1	1	1	1	1			1	1	1	1	1	1
	1	1	1	1	1	1			1	1	1	1	1	1
	1	1	1	1	1	1			1	1	1	1	1	1
	1	1	1	1	1	1			1	1	1	1	1	1
	1	1	1	1	1	1			1	1	1	1	1	1
	1	1	1	1	1	1			1	1	1	1	1	1
	1	1	1	1	1	1			1	1	1	1	1	1
	1	1	1	1	1	1			1	1	1	1	1	1
	1	1	1	1	1	1			1	1	1	1	1	1
	1	1	1	1	1	1			1	1	1	1	1	1
	1	1	1	1	1	1			1	1	1	1	1	1
	1	1	1	1	1	1			1	1	1	1	1	1
	1	1	1	1	1	1			1	1	1	1	1	1
	1	1	1	1	1	1			1	1	1	1	1	1
	1	1	1	1	1	1			1	1	1	1	1	1
	1	1	1	1	1	1			1	1	1	1	1	1
	1	1	1	1	1	1			1	1	1	2	1	1
	1	1	1	1	1	1			1	1	1	2	1	1
	1	1	1	1	1	1			1	1	1	2	1	1
	1	1	1	1	1	1			1	1	1	2	1	1
	1	1	1	1	1	1			1	1	1	2	1	1
	1	1	1	1	1	1			1	1	1	2	1	1
	1	1	1	1	1	1			1	1	1	2	1	1
	1	1	1	1	1	1			1	1	1	2	1	1
	1	1	1	1	1	1			1	1	1	2	1	1
	1	1	1	1	1	1			1	1	1	2	1	1
	1	1	1	1	1	1			1	1	1	2	1	1
	1	1	1	1	1	1			1	1	1	2	1	1
	1	1	1	1	1	1			1	1	1	2	1	1
	1	1	1	1	1	1			1	1	1	2	1	1
	1	1	1	1	1	1			1	1	1	2	1	1
	1	1	1	1	1	1			1	1	1	2	1	1
	1	1	1	1	1	1			1	1	1	2	1	1
	1	1	1	1	1	1			1	1	1	2	1	1
	1	1	1	1	1	1			1	1	1	2	1	1
	1	1	1	1	1	1			1	1	1	2	1	1
	1	1	1	1	1	1			1	1	1	2	1	1
	1	1	1	1	1	1			1	1	1	2	1	1
	1	1	1	1	1	1			1	1	2	2	1	1
	1	1	1	1	1	1			1	1	2	2	1	1
	1	1	1	1	1	1			1	1	2	3	1	1
	1	1	1	1	1	1			1	1	2	3	1	1
	1	1	1	1	1	1			1	1	2	3	1	1
	1	1	1	1	1	1			1	1	2	3	1	1
	1	1	1	1	1	1			1	1	2	3	1	1
	1	1	1	1	1	1			1	1	2	3	1	1
	1	1	1	1	1	1			1	1	2	3	2	1
	1	1	1	1	1	1			1	1	2	3	2	1
	1	1	1	1	1	1			1	1	2	3	2	1
	1	1	1	1	1	1			1	1	2	3	2	1
	1	1	1	1	1	1			1	1	2	3	2	2
	1	1	1	1	1	1			1	1	2	3	2	2
	1	1	1	1	1	1			1	1	2	3	2	2
	1	1	1	1	1	1			1	1	2	3	2	2
	1	1	1	1	1	1			1	1	2	3	2	2
	1	1	1	1	1	1			1	1	2	3	2	2
	1	1	1	1	1	1			1	1	2	3	2	2
	1	1	1	1	1	1			1	1	2	3	2	2
	1	1	1	1	1	1			1	1	2	3	2	2
	1	1	1	1	1	1			1	1	2	3	2	2
	1	1	1	1	1	1			1	1	2	3	2	2
	1	1	1	1	1	1			1	1	2	3	2	2
	1	1	1	1	2	1			1	1	2	3	2	2
	1	1	1	1	2	1			1	1	2	3	2	2
	1	1	1	1	2	1			1	1	2	3	2	2
	1	1	1	1	2	1			1	1	2	3	2	2
	1	1	1	1	2	1			1	1	2	3	2	2
	1	1	1	1	2	1			1	1	2	3	2	2
	1	1	1	1	2	1			1	1	2	3	2	2
	1	1	1	1	2	1			1	1	2	3	2	2
	1	1	1	1	2	1			1	1	2	3	2	2
	1	1	1	1	2	1			1	1	2	3	2	2
	1	1	1	1	2	1			1	1	2	3	2	2
	1	1	1	1	2	1			1	1	2	3	2	2
	1	1	1	1	2	1			1	1	2	3	2	2
	1	1	1	1	2	1			1	1	2	3	2	2
	1	1	1	1	2	1			1	1	2	3	2	2
	1	1	1	1	2	1			1	1	2	3	2	2
	1	1	1	1	2	1			1	1	2	3	2	2
	1	1	1	1	2	1			1	1	2	3	2	2
	1	1	1	1	2	1			1	1	2	3	2	2
	1	1	1	1	2	1			1	1	2	3	2	2
	1	1	1	1	2	1			1	1	2	3	2	2
	1	1	1	1	2	1			1	1	2	3	2	2
	1	1	1	1	2	1			1	1	2	3	3	2
	1	1	1	1	2	1			1	1	2	3	3	2
	1	1	1	1	2	1			1	1	2	3	3	3
	1	1	1	1	2	1			1	1	2	3	3	3
	1	1	1	1	2	1			1	1	2	3	3	3
	1	1	1	1	2	1			1	1	2	3	3	3
	1	1	1	1	2	2			1	1	2	3	3	3
	1	1	1	1	2	2			1	1	2	3	3	3
	1	1	1	1	2	2			1	1	2	3	3	3
	1	1	1	1	2	2			1	1	2	3	3	3
	1	1	1	1	2	2			1	1	2	3	3	3
	1	1	1	1	2	2			1	1	2	3	3	3
	1	1	1	1	2	2			1	1	2	3	3	3
	1	1	1	1	2	2			1	1	2	3	3	3
	1	1	1	1	2	2			1	1	2	3	3	3
	1	1	1	1	2	2			1	1	2	3	3	3
	1	1	1	1	2	2			1	1	2	3	3	3
	1	1	1	1	2	2			1	1	2	3	3	3
	1	1	1	1	2	2			1	1	2	3	3	3
	1	1	1	1	2	2			1	1	2	3	3	3
	1	1	1	1	2	2			1	2	3	3	3	3
	1	1	1	1	2	2			1	2	3	3	3	3
	1	1	2	1	2	2			1	2	3	3	3	3
	1	1	2	1	2	2			1	2	3	3	3	3
	1	1	2	2	2	2			1	2	3	3	3	3
	1	1	2	2	2	2			1	2	3	3	3	3
	1	1	2	2	2	2			1	2	3	3	3	3
	1	1	2	2	2	2			1	2	3	3	3	3
	1	1	2	2	2	2			1	2	3	3	3	3
	1	1	2	2	2	2			1	2	3	3	3	3
	1	1	2	2	2	2			2	2	3	3	3	3
	1	1	2	2	2	2			2	2	3	3	3	3
	1	1	2	2	2	2			2	2	3	3	3	3
	1	1	2	2	2	2			2	2	3	3	3	3
	1	1	2	2	2	2			2	2	3	3	3	3
	1	1	2	2	2	2			2	2	3	3	3	3
	1	1	2	2	2	2			2	2	3	3	3	3
	1	1	2	2	2	2			2	2	3	3	3	3
	1	1	2	2	2	2			2	2	3	3	3	3
	1	1	2	2	2	2			2	2	3	3	3	3
	1	1	2	2	2	2			2	2	3	3	3	3
	1	1	2	2	2	2			2	2	3	3	3	3
	1	1	2	2	2	3			2	2	3	3	3	3
	1	1	2	2	2	3			2	2	3	3	3	3
	1	1	2	2	2	3			2	2	3	3	3	3
	1	1	2	2	2	3			2	2	3	3	3	3
	1	1	2	2	2	3			3	2	3	3	3	3
	1	1	2	2	2	3			3	2	3	3	3	3
	1	1	2	2	2	3			3	2	3	3	3	3
	1	1	2	2	2	3			3	2	3	3	3	3
	1	1	2	2	2	3			3	2	3	3	3	3
	1	1	2	2	2	3			3	2	3	3	3	3
	1	1	2	2	2	3			3	2	3	3	3	3
	1	1	2	2	2	3			3	2	3	3	3	3
	1	1	2	2	2	3			3	2	3	3	3	3
	1	1	2	2	2	3			3	2	3	3	3	3
	1	1	2	2	2	3			3	2	3	3	3	3
	1	1	2	2	2	3			3	2	3	3	3	3
	1	1	2	2	2	3			3	2	3	3	3	3
	1	1	2	2	2	3			3	2	3	3	3	3
	1	1	2	2	2	3			3	2	3	3	3	3
	1	1	2	2	2	3			3	2	3	3	3	3
	1	1	2	2	2	3			3	3	3	3	3	3
	1	1	2	2	2	3			3	3	3	3	3	3
	1	1	2	2	2	3			3	3	3	3	3	3
	1	1	2	2	2	3			3	3	3	3	3	3
	1	1	2	2	2	3			3	3	3	3	3	3
	1	1	2	2	2	3			3	3	3	3	3	3
	1	1	2	2	2	3			3	3	3	3	3	3
	1	1	2	2	3	3			3	3	3	3	3	3
	1	1	2	2	3	3			3	3	3	3	3	3
	1	1	2	2	3	3			3	3	3	3	3	3
	1	1	2	2	3	3			3	3	3	3	3	3
	1	1	2	2	3	3			3	3	3	3	3	3
	1	1	2	2	3	3			3	3	3	3	3	3
	1	1	2	2	3	3			3	3	3	3	3	3
	1	1	2	2	3	3			3	3	3	3	3	3
	1	1	2	2	3	3			3	3	3	3	3	3
	1	1	2	2	3	3			3	3	3	3	3	3
	1	1	2	2	3	3			3	3	3	3	3	3
	1	1	2	2	3	3
	1	1	2	2	3	3		1 Susceptible	120	110	44	22	52	56
	1	1	2	2	3	3		2 Intermediate	16	42	66	24	38	36
	1	1	2	2	3	3		3 Resistant	34	18	60	124	80	78
	1	1	2	2	3	3		Total	170	170	170	170	170	170
	1	1	2	2	3	3
	1	1	2	2	3	3
	1	1	2	2	3	3
	1	1	2	2	3	3
	1	1	2	2	3	3
	1	1	2	2	3	3
	1	1	2	2	3	3
	1	1	2	2	3	3
	1	1	2	2	3	3
	1	1	2	2	3	3
	1	1	2	2	3	3
	1	1	2	2	3	3
	1	1	2	2	3	3
	1	1	2	2	3	3
	1	1	2	2	3	3
	1	1	2	2	3	3
	1	1	2	2	3	3
	1	1	2	2	3	3
	1	1	2	2	3	3
	1	1	2	2	3	3
	1	1	2	2	3	3
	1	1	2	2	3	3
	1	1	2	2	3	3
	1	1	2	2	3	3
	1	1	2	2	3	3
	1	1	2	2	3	3
	1	1	2	2	3	3
	1	1	2	2	3	3
	1	1	2	2	3	3
	1	1	2	2	3	3
	1	1	2	2	3	3
	1	1	2	2	3	3
	1	1	2	2	3	3
	1	1	2	2	3	3
	1	1	2	2	3	3
	1	1	2	2	3	3
	1	1	2	2	3	3
	1	1	2	2	3	3
	1	1	2	2	3	3
	1	1	2	2	3	3
	1	1	2	2	3	3
	1	1	2	2	3	3
	1	1	2	2	3	3
	1	1	2	2	3	3
	1	1	2	2	3	3
	1	1	2	2	3	3
	1	1	3	2	3	3
	1	1	3	2	3	3
	1	1	3	2	3	3
	1	1	3	3	3	3
	1	1	3	3	3	3
	1	1	3	3	3	3
	1	1	3	3	3	3
	1	1	3	3	3	3
	1	2	3	3	3	3
	1	2	3	3	3	3
	2	2	3	3	3	3
	2	2	3	3	3	3
	2	2	3	3	3	3
	2	2	3	3	3	3
	2	2	3	3	3	3
	2	2	3	3	3	3
	2	2	3	3	3	3
	2	2	3	3	3	3
	2	2	3	3	3	3
	2	2	3	3	3	3
	2	2	3	3	3	3
	2	2	3	3	3	3
	2	2	3	3	3	3
	2	2	3	3	3	3
	2	2	3	3	3	3
	2	2	3	3	3	3
	2	2	3	3	3	3
	2	2	3	3	3	3
	2	2	3	3	3	3
	2	2	3	3	3	3
	2	2	3	3	3	3
	2	2	3	3	3	3
	2	2	3	3	3	3
	2	2	3	3	3	3
	2	2	3	3	3	3
	2	2	3	3	3	3
	2	2	3	3	3	3
	2	2	3	3	3	3
	2	2	3	3	3	3
	2	2	3	3	3	3
	2	2	3	3	3	3
	2	2	3	3	3	3
	2	2	3	3	3	3
	2	2	3	3	3	3
	2	2	3	3	3	3
	2	2	3	3	3	3
	2	2	3	3	3	3
	2	2	3	3	3	3
	2	2	3	3	3	3
	2	2	3	3	3	3
	2	2	3	3	3	3
	2	2	3	3	3	3
	2	2	3	3	3	3
	2	2	3	3	3	3
	2	2	3	3	3	3
	2	2	3	3	3	3
	3	2	3	3	3	3
	3	2	3	3	3	3
	3	3	3	3	3	3
	3	3	3	3	3	3
	3	3	3	3	3	3
1 Susceptible	231	229	112	114	68	96
2 Intermediate	46	50	109	110	91	36
3 Resistant	5	3	61	58	123	150
Total	282	282	282	282	282	282

## Sheet: 2004
Candida albicans n=172	5- fluorocytosine	Amphotericin B	Miconazole	Ketoconazole	Itraconazole	Fluconazole		nCA n=196	5- fluorocytosine	Amphotericin B	Miconazole	Ketoconazole	Itraconazole	Fluconazole
	1	1	1	1	1	1			1	1	1	1	1	1
	1	1	1	1	1	1			1	1	1	1	1	1
	1	1	1	1	1	1			1	1	1	1	1	1
	1	1	1	1	1	1			1	1	1	1	1	1
	1	1	1	1	2	1			1	1	1	1	1	1
	1	1	1	1	2	1			1	1	1	1	1	1
	1	1	1	1	2	1			1	1	1	1	1	1
	1	1	1	1	2	1			1	1	1	1	1	1
	1	1	1	2	2	1			1	1	1	1	1	1
	1	1	1	2	2	1			1	1	1	1	1	1
	1	1	1	2	2	1			1	1	1	1	1	1
	1	1	1	2	2	1			1	1	1	1	1	1
	1	1	2	2	2	1			1	1	1	1	1	1
	1	1	2	2	2	1			1	1	1	1	1	1
	1	1	2	2	2	1			1	1	1	1	1	1
	1	1	2	2	2	1			1	1	1	1	1	1
	1	1	2	2	2	1			1	1	1	1	1	1
	1	1	2	2	2	1			1	1	1	1	1	1
	1	1	2	2	2	1			1	1	1	1	1	1
	1	1	2	2	2	1			1	1	1	1	1	1
	1	1	2	2	2	1			1	1	1	1	1	1
	1	1	2	2	2	1			1	1	1	1	1	1
	1	1	2	2	2	1			1	1	1	1	1	1
	1	1	2	2	2	1			1	1	1	1	1	1
	1	1	2	2	2	1			1	1	1	1	1	1
	1	1	2	2	2	1			1	1	1	1	1	1
	1	1	2	2	2	1			1	1	1	1	1	1
	1	1	2	2	2	1			1	1	1	1	1	1
	1	1	2	2	2	1			1	1	1	1	1	1
	1	1	2	2	2	2			1	1	1	1	1	1
	1	1	2	2	2	2			1	1	1	1	1	1
	1	1	2	2	2	2			1	1	1	1	1	1
	1	1	2	2	2	2			1	1	1	1	1	1
	1	1	2	2	2	2			1	1	1	1	1	1
	1	1	2	2	2	2			1	1	1	1	1	1
	1	1	2	2	2	2			1	1	1	1	1	1
	1	1	2	2	2	2			1	1	1	1	1	1
	1	1	2	2	2	2			1	1	1	1	1	1
	1	1	2	2	2	2			1	1	1	1	1	1
	1	1	2	2	2	2			1	1	1	1	1	1
	1	1	2	2	2	2			1	1	1	1	1	1
	1	1	2	2	2	2			1	1	1	1	1	1
	1	1	2	2	2	2			1	1	1	1	1	1
	1	1	2	2	2	2			1	1	1	1	1	1
	1	1	2	2	2	2			1	1	1	1	1	1
	1	1	2	2	2	2			1	1	1	1	1	1
	1	1	2	2	2	2			1	1	2	1	1	1
	1	1	2	2	2	2			1	1	2	1	1	1
	1	1	2	2	2	2			1	1	2	1	1	1
	1	1	2	2	2	2			1	1	2	1	1	1
	1	1	2	2	2	2			1	1	2	1	2	1
	1	1	2	2	2	2			1	1	2	1	2	1
	1	1	2	2	2	2			1	1	2	2	2	1
	1	1	2	2	2	2			1	1	2	2	2	1
	1	1	2	2	2	2			1	1	2	2	2	1
	1	1	2	2	2	2			1	1	2	2	2	1
	1	1	2	2	2	2			1	1	2	2	2	1
	1	1	2	2	2	2			1	1	2	2	2	1
	1	1	2	2	2	2			1	1	2	2	2	1
	1	1	2	2	2	2			1	1	2	2	2	1
	1	1	2	2	2	2			1	1	2	2	2	1
	1	1	2	2	2	2			1	1	2	2	2	1
	1	1	2	2	2	2			1	1	2	2	2	1
	1	1	2	2	2	2			1	1	2	2	2	1
	1	1	2	2	2	2			1	1	2	2	2	2
	1	1	2	2	2	2			1	1	2	2	2	2
	1	1	2	2	2	2			1	1	2	2	2	2
	1	1	2	2	2	2			1	1	2	2	2	2
	1	1	2	2	2	2			1	1	2	2	2	2
	1	1	2	2	2	2			1	1	2	2	2	2
	1	1	2	2	2	2			1	1	2	2	2	2
	1	1	2	2	2	2			1	1	2	2	2	2
	1	1	2	2	2	2			1	1	2	2	2	2
	1	1	2	2	2	2			1	1	2	2	2	2
	1	1	2	2	2	2			1	1	2	2	2	2
	1	1	2	2	2	2			1	1	2	2	2	2
	1	1	2	2	2	2			1	1	2	2	2	2
	1	1	2	2	2	2			1	1	2	2	2	2
	1	1	2	2	2	2			1	1	2	2	2	2
	1	1	2	2	2	2			1	1	2	2	2	2
	1	1	2	2	2	2			1	1	2	2	2	2
	1	1	2	2	3	2			1	1	2	2	2	2
	1	1	2	2	3	2			1	1	2	2	3	2
	1	1	2	2	3	2			1	1	2	2	3	2
	1	1	2	2	3	2			1	1	2	2	3	2
	1	1	2	2	3	2			1	1	2	3	3	2
	1	1	2	3	3	2			1	1	2	3	3	2
	1	1	2	3	3	2			1	1	2	3	3	2
	1	1	2	3	3	2			1	1	2	3	3	2
	1	1	2	3	3	2			1	1	2	3	3	2
	1	1	2	3	3	2			1	1	2	3	3	2
	1	1	2	3	3	2			1	1	2	3	3	2
	1	1	2	3	3	2			1	1	2	3	3	2
	1	1	2	3	3	2			1	1	2	3	3	2
	1	2	2	3	3	2			1	1	2	3	3	3
	1	2	2	3	3	2			1	1	2	3	3	3
	1	2	2	3	3	2			1	1	2	3	3	3
	1	2	2	3	3	2			1	1	2	3	3	3
	1	2	2	3	3	2			1	1	2	3	3	3
	2	2	2	3	3	2			1	1	2	3	3	3
	2	2	2	3	3	3			1	1	2	3	3	3
	2	2	2	3	3	3			1	1	2	3	3	3
	2	2	2	3	3	3			1	1	2	3	3	3
	2	2	2	3	3	3			1	1	2	3	3	3
	2	2	2	3	3	3			1	2	2	3	3	3
	2	2	2	3	3	3			1	2	2	3	3	3
	2	2	3	3	3	3			1	2	2	3	3	3
	2	2	3	3	3	3			1	2	2	3	3	3
	2	2	3	3	3	3			1	2	2	3	3	3
	2	2	3	3	3	3			1	2	2	3	3	3
	2	2	3	3	3	3			1	2	2	3	3	3
	2	2	3	3	3	3			1	2	2	3	3	3
	2	2	3	3	3	3			1	2	2	3	3	3
	2	2	3	3	3	3			1	2	2	3	3	3
	2	2	3	3	3	3			1	2	2	3	3	3
	2	2	3	3	3	3			1	2	2	3	3	3
	2	2	3	3	3	3			1	2	2	3	3	3
	2	2	3	3	3	3			1	2	2	3	3	3
	2	2	3	3	3	3			1	2	2	3	3	3
	2	2	3	3	3	3			1	2	2	3	3	3
	2	2	3	3	3	3			1	2	2	3	3	3
	2	2	3	3	3	3			1	2	2	3	3	3
	2	2	3	3	3	3			1	2	2	3	3	3
	2	2	3	3	3	3			1	2	2	3	3	3
	2	2	3	3	3	3			1	2	2	3	3	3
	2	2	3	3	3	3			1	2	2	3	3	3
	2	2	3	3	3	3			1	2	2	3	3	3
	2	2	3	3	3	3			1	2	2	3	3	3
	2	2	3	3	3	3			1	2	2	3	3	3
	2	2	3	3	3	3			1	2	2	3	3	3
	2	2	3	3	3	3			1	2	2	3	3	3
	2	2	3	3	3	3			1	2	2	3	3	3
	2	2	3	3	3	3			1	2	2	3	3	3
	2	2	3	3	3	3			1	2	2	3	3	3
	2	2	3	3	3	3			1	2	2	3	3	3
	2	2	3	3	3	3			1	2	2	3	3	3
	2	2	3	3	3	3			1	2	2	3	3	3
	2	2	3	3	3	3			1	2	2	3	3	3
	2	2	3	3	3	3			1	2	2	3	3	3
	2	2	3	3	3	3			1	2	2	3	3	3
	2	2	3	3	3	3			1	2	2	3	3	3
	2	2	3	3	3	3			1	2	2	3	3	3
	2	2	3	3	3	3			1	2	3	3	3	3
	2	2	3	3	3	3			1	2	3	3	3	3
	2	2	3	3	3	3			1	2	3	3	3	3
	2	2	3	3	3	3			1	2	3	3	3	3
	2	2	3	3	3	3			1	2	3	3	3	3
	2	2	3	3	3	3			1	2	3	3	3	3
	2	2	3	3	3	3			2	2	3	3	3	3
	2	2	3	3	3	3			2	2	3	3	3	3
	2	2	3	3	3	3			2	2	3	3	3	3
	2	2	3	3	3	3			2	2	3	3	3	3
	3	2	3	3	3	3			2	2	3	3	3	3
	3	2	3	3	3	3			2	2	3	3	3	3
	3	2	3	3	3	3			2	2	3	3	3	3
	3	2	3	3	3	3			2	2	3	3	3	3
	3	2	3	3	3	3			2	2	3	3	3	3
	3	2	3	3	3	3			2	2	3	3	3	3
	3	2	3	3	3	3			2	2	3	3	3	3
	3	2	3	3	3	3			2	2	3	3	3	3
	3	2	3	3	3	3			2	2	3	3	3	3
	3	2	3	3	3	3			2	2	3	3	3	3
	3	2	3	3	3	3			2	2	3	3	3	3
	3	2	3	3	3	3			2	2	3	3	3	3
	3	2	3	3	3	3			2	2	3	3	3	3
	3	2	3	3	3	3			2	2	3	3	3	3
	3	3	3	3	3	3			2	2	3	3	3	3
	3	3	3	3	3	3			2	2	3	3	3	3
	3	3	3	3	3	3			2	2	3	3	3	3
	3	3	3	3	3	3			2	2	3	3	3	3
	3	3	3	3	3	3			2	2	3	3	3	3
	3	3	3	3	3	3			2	2	3	3	3	3
									2	2	3	3	3	3
1 Susceptible	99	94	12	8	4	29			2	2	3	3	3	3
2 Intermediate	53	72	94	78	77	71			2	2	3	3	3	3
3 Resistant	20	6	66	86	91	72			2	2	3	3	3	3
Total	172	172	172	172	172	172			2	2	3	3	3	3
									2	2	3	3	3	3
									2	2	3	3	3	3
									2	2	3	3	3	3
									2	3	3	3	3	3
									2	3	3	3	3	3
									2	3	3	3	3	3
									2	3	3	3	3	3
									2	3	3	3	3	3
									2	3	3	3	3	3
									3	3	3	3	3	3
									3	3	3	3	3	3
									3	3	3	3	3	3
									3	3	3	3	3	3
									3	3	3	3	3	3
									3	3	3	3	3	3
									3	3	3	3	3	3
									3	3	3	3	3	3
									3	3	3	3	3	3
									3	3	3	3	3	3
								1 Susceptible	148	104	46	52	50	64
								2 Intermediate	38	76	96	33	32	30
								3 Resistant	10	16	54	111	114	102
								Total	196	196	196	196	196	196

## Sheet: 2015
CA n=176	5- fluorocytosine	Amphotericin B	Miconazole	Ketoconazole	Itraconazole	Fluconazole		nCA n=278	5- fluorocytosine	Amphotericin B	Miconazole	Ketoconazole	Itraconazole	Fluconazole
	1	1	1	1	1	1			1	1	1	1	1	1
	1	1	1	1	1	1			1	1	1	1	1	1
	1	1	1	1	1	1			1	1	1	1	1	1
	1	1	1	1	1	1			1	1	1	1	1	1
	1	1	1	1	1	1			1	1	1	1	1	1
	1	1	1	1	1	1			1	1	1	1	1	1
	1	1	1	1	1	1			1	1	1	1	1	1
	1	1	1	1	1	1			1	1	1	1	1	1
	1	1	1	1	1	1			1	1	1	1	1	1
	1	1	1	1	1	1			1	1	1	1	1	1
	1	1	1	1	1	1			1	1	1	1	1	1
	1	1	1	1	1	1			1	1	1	1	1	1
	1	1	1	1	1	1			1	1	1	1	1	1
	1	1	1	1	1	1			1	1	1	1	1	1
	1	1	1	1	1	1			1	1	1	1	1	1
	1	1	1	1	1	1			1	1	1	1	1	1
	1	1	1	1	1	1			1	1	1	1	1	1
	1	1	1	1	2	1			1	1	1	1	1	1
	1	1	1	1	2	1			1	1	1	1	1	1
	1	1	1	1	2	1			1	1	1	1	1	1
	1	1	1	1	2	2			1	1	1	1	1	1
	1	1	1	1	2	2			1	1	1	1	1	1
	1	1	1	1	2	2			1	1	1	1	1	1
	1	1	1	1	2	2			1	1	1	1	1	1
	1	1	1	1	2	2			1	1	1	1	1	1
	1	1	1	1	2	3			1	1	1	1	1	1
	1	1	1	1	2	3			1	1	1	1	1	1
	1	1	1	1	2	3			1	1	1	1	1	1
	1	1	1	1	2	3			1	1	1	1	1	1
	1	1	1	1	2	3			1	1	1	1	1	1
	1	1	1	1	2	3			1	1	1	1	1	1
	1	1	1	1	2	3			1	1	1	1	1	1
	1	1	1	1	3	3			1	1	1	1	1	1
	1	1	1	1	3	3			1	1	1	1	1	1
	1	1	1	1	3	3			1	1	1	1	1	1
	1	1	1	1	3	3			1	1	1	1	1	1
	1	1	1	1	3	3			1	1	1	1	1	1
	1	1	1	1	3	3			1	1	1	1	1	1
	1	1	1	1	3	3			1	1	1	1	1	1
	1	1	1	1	3	3			1	1	1	1	1	1
	1	1	1	1	3	3			1	1	1	1	1	1
	1	1	1	1	3	3			1	1	1	1	1	1
	1	1	1	1	3	3			1	1	1	1	1	1
	1	1	1	2	3	3			1	1	1	1	1	1
	1	1	1	2	3	3			1	1	1	1	1	1
	1	1	1	2	3	3			1	1	1	1	1	1
	1	1	1	2	3	3			1	1	1	1	1	1
	1	1	1	2	3	3			1	1	1	1	1	1
	1	1	1	2	3	3			1	1	1	1	1	1
	1	1	1	2	3	3			1	1	1	1	1	1
	1	1	1	2	3	3			1	1	1	1	1	1
	1	1	1	2	3	3			1	1	1	1	1	1
	1	1	1	2	3	3			1	1	1	1	1	1
	1	1	1	2	3	3			1	1	1	1	1	1
	1	1	1	2	3	3			1	1	1	1	1	1
	1	1	1	2	3	3			1	1	1	1	1	1
	1	1	1	2	3	3			1	1	1	1	1	1
	1	1	1	2	3	3			1	1	1	1	1	1
	1	1	1	2	3	3			1	1	1	1	1	1
	1	1	1	2	3	3			1	1	1	1	1	1
	1	1	1	2	3	3			1	1	1	1	1	1
	1	1	1	2	3	3			1	1	1	1	1	1
	1	1	1	2	3	3			1	1	1	1	1	1
	1	1	1	2	3	3			1	1	1	1	1	1
	1	1	1	2	3	3			1	1	1	1	1	1
	1	1	1	2	3	3			1	1	1	1	1	1
	1	1	1	2	3	3			1	1	1	1	1	1
	1	1	1	2	3	3			1	1	1	1	1	1
	1	1	2	2	3	3			1	1	1	1	1	1
	1	1	2	2	3	3			1	1	1	1	1	1
	1	1	2	2	3	3			1	1	1	1	1	1
	1	1	2	2	3	3			1	1	1	1	1	1
	1	1	2	2	3	3			1	1	1	1	1	2
	1	1	2	2	3	3			1	1	1	1	1	2
	1	1	2	2	3	3			1	1	1	1	1	2
	1	1	2	2	3	3			1	1	1	1	1	2
	1	2	2	2	3	3			1	1	1	1	1	2
	1	2	2	2	3	3			1	1	1	1	1	2
	1	2	2	2	3	3			1	1	1	1	1	2
	1	2	2	2	3	3			1	1	1	1	1	2
	1	2	2	2	3	3			1	1	1	1	1	2
	1	2	2	2	3	3			1	1	1	1	1	2
	1	2	2	3	3	3			1	1	1	1	1	2
	1	2	2	3	3	3			1	1	1	1	1	2
	1	2	2	3	3	3			1	1	1	1	1	2
	1	2	2	3	3	3			1	1	1	1	1	2
	1	2	2	3	3	3			1	1	1	1	1	2
	1	2	2	3	3	3			1	1	1	1	1	2
	1	2	2	3	3	3			1	1	1	1	1	2
	1	2	2	3	3	3			1	1	1	1	1	2
	1	2	2	3	3	3			1	1	1	1	1	2
	1	2	2	3	3	3			1	1	1	1	1	2
	1	2	3	3	3	3			1	1	1	1	1	2
	1	2	3	3	3	3			1	1	1	1	1	2
	1	2	3	3	3	3			1	1	1	1	1	2
	1	2	3	3	3	3			1	1	1	1	1	2
	1	2	3	3	3	3			1	1	1	1	1	2
	2	2	3	3	3	3			1	1	1	1	1	2
	2	2	3	3	3	3			1	1	1	1	1	2
	2	2	3	3	3	3			1	1	1	1	1	2
	2	2	3	3	3	3			1	1	1	1	1	2
	2	2	3	3	3	3			1	1	1	1	1	2
	2	2	3	3	3	3			1	1	1	1	1	2
	2	2	3	3	3	3			1	1	1	1	1	2
	2	2	3	3	3	3			1	1	1	2	1	2
	2	2	3	3	3	3			1	1	1	2	1	2
	2	2	3	3	3	3			1	1	1	2	1	2
	2	2	3	3	3	3			1	1	1	2	1	2
	2	2	3	3	3	3			1	1	1	2	1	2
	2	2	3	3	3	3			1	1	1	2	2	2
	2	2	3	3	3	3			1	1	1	2	2	2
	2	2	3	3	3	3			1	1	1	2	2	2
	2	2	3	3	3	3			1	1	1	2	2	2
	2	2	3	3	3	3			1	1	1	2	2	2
	2	2	3	3	3	3			1	1	1	2	2	2
	2	2	3	3	3	3			1	1	1	2	2	2
	2	2	3	3	3	3			1	1	2	2	2	2
	2	2	3	3	3	3			1	1	2	2	2	2
	2	2	3	3	3	3			1	1	2	2	2	2
	2	2	3	3	3	3			1	1	2	2	2	2
	2	2	3	3	3	3			1	1	2	2	2	2
	2	2	3	3	3	3			1	1	2	2	2	2
	2	2	3	3	3	3			1	1	2	2	2	2
	2	2	3	3	3	3			1	1	2	2	2	2
	2	2	3	3	3	3			1	1	2	2	2	2
	2	2	3	3	3	3			1	1	2	2	2	2
	2	2	3	3	3	3			1	1	2	2	2	2
	2	2	3	3	3	3			1	1	2	2	2	2
	2	2	3	3	3	3			1	1	2	2	2	2
	2	2	3	3	3	3			1	1	2	2	2	2
	2	2	3	3	3	3			1	1	2	2	2	2
	2	2	3	3	3	3			1	1	2	2	2	2
	2	2	3	3	3	3			1	1	2	2	2	2
	2	2	3	3	3	3			1	1	2	2	2	2
	2	2	3	3	3	3			1	1	2	2	2	2
	2	2	3	3	3	3			1	1	2	2	2	2
	2	2	3	3	3	3			1	1	2	2	2	2
	2	2	3	3	3	3			1	1	2	2	2	2
	2	2	3	3	3	3			1	1	2	2	2	2
	2	2	3	3	3	3			1	1	2	2	2	2
	2	2	3	3	3	3			1	1	2	2	2	2
	2	2	3	3	3	3			1	1	2	2	2	2
	3	2	3	3	3	3			1	1	2	2	2	2
	3	2	3	3	3	3			1	1	2	2	2	2
	3	2	3	3	3	3			1	1	2	2	2	2
	3	2	3	3	3	3			1	1	2	2	2	2
	3	3	3	3	3	3			1	1	2	2	2	2
	3	3	3	3	3	3			1	1	2	2	2	2
	3	3	3	3	3	3			1	1	2	2	2	2
	3	3	3	3	3	3			1	1	2	2	2	2
	3	3	3	3	3	3			1	1	2	2	2	2
	3	3	3	3	3	3			1	1	2	2	2	2
	3	3	3	3	3	3			1	1	2	2	2	2
	3	3	3	3	3	3			1	1	2	2	2	3
	3	3	3	3	3	3			1	1	2	2	2	3
	3	3	3	3	3	3			1	1	2	2	2	3
	3	3	3	3	3	3			1	1	2	2	2	3
	3	3	3	3	3	3			1	1	2	2	2	3
	3	3	3	3	3	3			1	1	2	2	2	3
	3	3	3	3	3	3			1	1	2	2	2	3
	3	3	3	3	3	3			1	1	2	2	2	3
	3	3	3	3	3	3			1	1	2	2	2	3
	3	3	3	3	3	3			1	1	2	2	2	3
	3	3	3	3	3	3			1	1	2	2	2	3
	3	3	3	3	3	3			1	1	2	2	2	3
	3	3	3	3	3	3			1	1	2	2	2	3
	3	3	3	3	3	3			1	1	2	2	2	3
	3	3	3	3	3	3			1	1	2	2	2	3
	3	3	3	3	3	3			1	1	2	2	2	3
	3	3	3	3	3	3			1	1	2	2	2	3
	3	3	3	3	3	3			1	1	2	2	2	3
	3	3	3	3	3	3			1	1	2	2	2	3
	3	3	3	3	3	3			1	1	2	2	2	3
	3	3	3	3	3	3			1	1	2	2	2	3
	3	3	3	3	3	3			1	1	2	2	2	3
	3	3	3	3	3	3			1	1	2	2	2	3
									1	1	2	2	2	3
1 Susceptible	97	76	68	43	17	20			1	1	2	2	2	3
2 Intermediate	45	70	24	39	15	5			1	1	2	2	2	3
3 Resistant	34	30	84	94	144	151			1	1	2	2	2	3
Total	176	176	176	176	176	176			1	1	2	2	2	3
									2	1	2	2	2	3
									2	1	2	2	2	3
									2	1	2	2	2	3
									2	1	2	2	2	3
									2	1	2	2	3	3
									2	1	2	2	3	3
									2	1	2	2	3	3
									2	1	2	3	3	3
									2	1	2	3	3	3
									2	1	2	3	3	3
									2	1	2	3	3	3
									2	1	2	3	3	3
									2	1	2	3	3	3
									2	1	2	3	3	3
									2	2	3	3	3	3
									2	2	3	3	3	3
									2	2	3	3	3	3
									2	2	3	3	3	3
									2	2	3	3	3	3
									2	2	3	3	3	3
									2	2	3	3	3	3
									2	2	3	3	3	3
									2	2	3	3	3	3
									2	2	3	3	3	3
									2	2	3	3	3	3
									2	2	3	3	3	3
									2	2	3	3	3	3
									2	2	3	3	3	3
									2	2	3	3	3	3
									2	2	3	3	3	3
									2	2	3	3	3	3
									2	2	3	3	3	3
									2	2	3	3	3	3
									2	2	3	3	3	3
									2	2	3	3	3	3
									2	2	3	3	3	3
									2	2	3	3	3	3
									2	2	3	3	3	3
									2	2	3	3	3	3
									2	2	3	3	3	3
									2	2	3	3	3	3
									2	2	3	3	3	3
									2	2	3	3	3	3
									2	2	3	3	3	3
									2	2	3	3	3	3
									2	2	3	3	3	3
									2	2	3	3	3	3
									2	2	3	3	3	3
									2	2	3	3	3	3
									2	2	3	3	3	3
									2	2	3	3	3	3
									2	2	3	3	3	3
									2	2	3	3	3	3
									2	2	3	3	3	3
									2	2	3	3	3	3
									2	2	3	3	3	3
									2	2	3	3	3	3
									2	2	3	3	3	3
									2	2	3	3	3	3
									2	2	3	3	3	3
									2	2	3	3	3	3
									2	2	3	3	3	3
									2	2	3	3	3	3
									2	2	3	3	3	3
									2	2	3	3	3	3
									2	2	3	3	3	3
									2	2	3	3	3	3
									2	2	3	3	3	3
									2	2	3	3	3	3
									2	2	3	3	3	3
									2	2	3	3	3	3
									2	2	3	3	3	3
									2	2	3	3	3	3
									2	2	3	3	3	3
									2	2	3	3	3	3
									2	2	3	3	3	3
									2	2	3	3	3	3
									2	2	3	3	3	3
									2	2	3	3	3	3
									2	2	3	3	3	3
									2	2	3	3	3	3
									2	2	3	3	3	3
									2	2	3	3	3	3
									2	2	3	3	3	3
									2	2	3	3	3	3
									2	2	3	3	3	3
									2	2	3	3	3	3
									2	2	3	3	3	3
									2	2	3	3	3	3
									2	2	3	3	3	3
									3	2	3	3	3	3
									3	2	3	3	3	3
									3	2	3	3	3	3
									3	3	3	3	3	3
									3	3	3	3	3	3
									3	3	3	3	3	3
									3	3	3	3	3	3
								1 Susceptible	181	195	116	104	109	72
								2 Intermediate	90	79	79	84	76	81
								3 Resistant	7	4	83	90	93	125
								Total	278	278	278	278	278	278

## Sheet: Ca 1iwiecej
Candida	1999	year						2004	year						2015	year
resistance to 1 or more antifungals	>1	1	2	3	4	5		>1	1	2	3	4	5		>1	1	2	3	4	5
	1		1	1	1			1	1	1	1	1	1		1	1	1	1	1	1
	1		1	1	1			1	1	1	1	1	1		1	1	1	1	1	1
	1		1	1	1			1		1	1	1	1		1	1	1	1	1	1
	1		1	1	1			1		1	1	1	1		1	1	1	1	1	1
	1		1	1	1			1			1	1	1		1	1	1	1	1	1
	1		1	1	1			1			1	1	1		1	1	1	1	1	1
	1		1	1	1			1			1	1	1		1	1	1	1	1
	1		1	1	1			1			1	1	1		1	1	1	1	1
	1		1	1	1			1			1	1			1	1	1	1	1
	1		1	1	1			1			1	1			1	1	1	1	1
	1		1	1	1			1			1	1			1	1	1	1	1
	1		1	1	1			1			1	1			1	1	1	1	1
	1		1	1	1			1			1	1			1	1	1	1
	1		1	1	1			1			1	1			1	1	1	1
	1		1	1	1			1			1	1			1	1		1
	1		1	1	1			1			1	1			1	1		1
	1		1	1	1			1			1	1			1	1		1
	1		1	1	1			1			1	1			1	1		1
	1			1	1			1			1	1			1	1		1
	1			1	1			1			1	1			1	1		1
	1			1	1			1			1	1			1	1		1
	1			1	1			1			1	1			1	1		1
	1			1				1			1	1			1	1		1
	1			1				1			1	1			1	1		1
	1			1				1			1	1			1	1		1
	1			1				1			1	1			1	1		1
	1			1				1			1	1			1	1		1
	1			1				1			1	1			1	1		1
	1			1				1			1	1			1	1		1
	1			1				1			1	1			1	1		1
	1			1				1			1	1			1	1		1
	1			1				1			1	1			1	1		1
	1			1				1			1	1			1	1		1
	1			1				1			1	1			1	1		1
	1			1				1			1	1			1	1		1
	1			1				1			1	1			1	1		1
	1			1				1			1	1			1	1		1
	1			1				1			1	1			1	1		1
	1			1				1			1	1			1	1		1
	1			1				1			1	1			1	1		1
	1			1				1			1	1			1	1		1
	1			1				1				1			1	1		1
	1			1				1				1			1	1		1
	1			1				1				1			1	1		1
	1			1				1				1			1	1		1
	1			1				1				1			1	1		1
	1			1				1				1			1	1		1
	1			1				1				1			1	1		1
	1			1				1				1			1	1		1
	1			1				1				1			1	1
	1			1				1				1			1	1
	1			1				1				1			1	1
	1			1				1				1			1	1
	1			1				1				1			1	1
	1			1				1				1			1	1
	1			1				1				1			1	1
	1			1				1				1			1	1
	1			1				1				1			1	1
	1			1				1				1			1	1
	1			1				1				1			1	1
	1			1				1				1			1	1
	1							1							1	1
	1							1							1	1
	1							1							1	1
	1							1							1	1
	1							1							1	1
	1							1							1	1
	1							1							1	1
	1							1							1	1
	1							1							1	1
	1							1							1	1
	1							1							1	1
	1							1							1	1
	1							1							1	1
	1							1							1	1
	1							1							1	1
	1							1							1	1
	1							1							1	1
	1							1							1	1
	1							1							1	1
	1							1							1	1
	1							1							1
	1							1							1
	1							1							1
	1							1							1
	1							1							1
	1							1							1
	1							1							1
	1							1							1
	1							1							1
	1							1							1
	1							1							1
	1							1							1
	1							1							1
	1							1							1
	1							1							1
	1							1							1
	1							1							1
	1							1							1
	1							1							1
	1							1							1
								1							1
								1							1
								1							1
								1							1
								1							1
								1							1
								1							1
								1							1
								1							1
								1							1
								1							1
								1							1
								1							1
								1							1
								1							1
															1
															1
															1
															1
															1
															1
															1
															1
															1
															1
															1
															1
															1
															1
															1
															1
															1
															1
															1
															1
															1
															1
															1
															1
															1
															1
															1
															1
															1
															1
															1
															1
															1
															1
															1
															1
															1
															1
															1
															1
															1
															1
															1
															1
															1
															1

## Sheet: nCa 1iwiecej
non-Candida	1999	year						2004	year						2015	year
Resistance to1 or more antifungals	>1	1	2	3	4	5		>1	1	2	3	4	5		>1	1	2	3	4	5
	1	1	1	1	1	1		1	1	1	1	1	1		1	1	1	1	1	1
	1	1	1	1	1	1		1	1	1	1	1	1		1	1	1	1	1	1
	1	1	1	1	1	1		1	1	1	1	1	1		1	1	1	1		1
	1	1	1	1	1	1		1	1	1	1	1	1		1	1	1	1		1
	1	1	1	1	1			1	1	1	1	1	1		1	1	1	1		1
	1	1	1	1	1			1	1	1	1	1	1		1	1	1	1		1
	1	1		1	1			1	1	1	1	1	1		1	1	1	1		1
	1	1		1	1			1	1	1	1	1	1		1	1	1			1
	1	1		1	1			1	1	1	1	1			1	1	1			1
	1	1		1	1			1	1	1	1	1			1	1	1			1
	1	1		1	1			1	1	1	1	1			1	1	1
	1	1		1	1			1	1	1	1	1			1	1	1
	1	1		1	1			1	1	1	1	1			1	1	1
	1	1		1	1			1	1	1	1	1			1	1	1
	1	1			1			1	1	1	1	1			1	1	1
	1	1			1			1	1	1	1	1			1	1	1
	1	1			1			1	1	1	1	1			1	1	1
	1	1			1			1	1	1	1	1			1	1	1
	1	1			1			1	1	1	1	1			1	1	1
	1	1			1			1	1	1	1	1			1	1	1
	1	1			1			1	1	1	1	1			1	1	1
	1	1						1		1	1	1			1	1	1
	1	1						1		1	1	1			1	1	1
	1	1						1		1	1	1			1	1	1
	1	1						1		1	1	1			1	1	1
	1	1						1		1	1	1			1	1	1
	1	1						1		1	1				1	1	1
	1	1						1		1	1				1	1	1
	1	1						1		1	1				1	1	1
	1	1						1		1	1				1	1	1
	1	1						1		1	1				1	1	1
	1	1						1		1	1				1	1	1
	1	1						1		1	1				1	1	1
	1	1						1		1	1				1	1	1
	1	1						1			1				1	1	1
	1	1						1			1				1	1	1
	1	1						1			1				1	1	1
	1	1						1			1				1	1	1
	1	1						1			1				1	1	1
	1	1						1			1				1	1	1
	1	1						1			1				1	1	1
	1	1						1							1	1	1
	1	1						1							1	1	1
	1	1						1							1	1	1
	1	1						1							1	1	1
	1							1							1	1	1
	1							1							1	1	1
	1							1							1	1	1
	1							1							1	1	1
	1							1							1	1	1
	1							1							1	1	1
	1							1							1	1	1
	1							1							1	1	1
	1							1							1	1	1
	1							1							1	1	1
	1							1							1	1	1
	1							1							1	1	1
	1							1							1	1	1
	1							1							1	1	1
	1							1							1	1	1
	1							1							1	1	1
	1							1							1	1	1
	1							1							1	1	1
	1							1							1	1	1
	1							1							1	1	1
	1							1							1	1	1
	1							1							1	1	1
	1							1							1	1	1
	1							1							1	1	1
	1							1							1	1	1
	1							1							1	1	1
	1							1							1	1	1
	1							1							1	1	1
	1							1							1	1	1
	1							1							1	1	1
	1							1							1	1	1
	1							1							1	1	1
	1							1							1	1	1
	1							1							1	1	1
	1							1							1	1	1
	1							1							1	1	1
	1							1							1	1	1
	1							1							1	1	1
	1							1							1	1	1
	1							1							1	1	1
	1							1							1	1	1
	1							1							1	1	1
	1							1							1	1	1
	1							1							1	1	1
	1							1							1	1	1
	90	45	6	14	21	4		1							1	1	1
								1							1	1	1
								1							1	1	1
								1							1	1	1
								1							1	1	1
								1							1	1	1
								1							1	1	1
								1							1	1	1
								1							1	1	1
								1							1	1	1
								1							1	1	1
								1							1		1
								1							1		1
								1							1		1
								1							1		1
								1							1		1
								1							1		1
								1							1		1
								1							1		1
								1							1		1
								1							1		1
								1							1		1
								1							1		1
								1							1		1
								1							1		1
								1							1		1
								1							1		1
								1							1		1
								1							1		1
								1							1		1
								1							1		1
								1							1		1
								1							1		1
								1							1		1
								1							1		1
								1							1
								126	21	34	41	26	8		1
															1
															1
															1
															1
															1
															1
															1
															1
															1
															1
															1
															1
															1
															1
															1
															1
															1
															1
															1
															1
															1
															1
															1
															1
															1
															1
															1
															1
															1
															1
															1
															1
															1
															1
															1
															1
															1
															1
															1
															1
															1
															1
															1
															1
															1
															1
															1
															1
															1
															1
															1
															1
															1
															1
															1
															1
															1
															1
															1
															1
															1
															1
															1
															1
															1
															1
															1
															1
															1
															1
															1
															1
															1
															1
															1
															1
															1
															1
															1
															1
															1
															1
															1
															1
															1
															1
															1
															1
															1
															1
															1
															1
															1
															1
															1
															1
															1
															1
															1
															1
															1
															1
															1
															1
															1
															1
															1
															1
															1
															1
															1
															1
															1
															1
															1
															1
															1
															1
															245	101	125	7	2	10
